# Supplementary material
Source: publisher figshare collection journal article supplement (https://acs.figshare.com/ndownloader/files/38314442)
Supplement: Supplementary file 1 [file 38314442]

## Supporting information

### **Csm6-DNAzyme tandem assay for one-pot and sensitive analysis of lead pollution and bioaccumulation in mice**

Hao Yang<sup>a</sup>, Feng Li<sup>b</sup>, Ting Xue<sup>a</sup>, Mohammad Rizwan Khan<sup>d</sup>, Xuhan Xia<sup>a</sup>, Rosa Busquets<sup>e</sup>, Hong Gao<sup>a,\*</sup>, Yi Dong<sup>a</sup>, Wenhui Zhou<sup>c</sup>, Ruijie Deng<sup>a,\*</sup>

<sup>a</sup> College of Biomass Science and Engineering, Sichuan University, Chengdu 610065, China

<sup>b</sup> Key Laboratory of Green Chemistry & Technology of Ministry of Education, College of Chemistry, Analytical & Testing Center, Sichuan University, Chengdu, Sichuan 610065, China

<sup>c</sup> Xiangya School of Pharmaceutical Sciences, Central South University, Changsha, Hunan 410013, China

<sup>d</sup> Department of Chemistry, College of Science, King Saud University, Riyadh, 11451, Saudi Arabia

<sup>e</sup> School of Life Sciences, Pharmacy and Chemistry, Kingston University London, Penrhyn Road, KT1 2EE, Kingston Upon Thames, United Kingdom

\*e-mail:

Hong Gao, gao523@hotmail.com

Ruijie Deng, [drj17@scu.edu.cn](mailto:drj17@scu.edu.cn)

## Table of content

|                                                                                                                                                                       |     |
|-----------------------------------------------------------------------------------------------------------------------------------------------------------------------|-----|
| <b>Table S1.</b> Oligonucleotide sequences.....                                                                                                                       | S3  |
| <b>Table S2.</b> Sequences of plasmids containing DNA sequences encoding for <i>Thermus thermophilus</i> Csm6 (TtCsm6) and <i>Enterococcus italicus</i> (EiCsm6)..... | S4  |
| <b>Table S3.</b> Detection of Pb <sup>2+</sup> spiked in the fresh egg and tap water samples.....                                                                     | S5  |
| <b>Table S4.</b> Comparisons of detection performance of different fluorescent assays.....                                                                            | S6  |
| <b>Figure S1.</b> Plasmid vector for expression of TtCsm6.....                                                                                                        | S7  |
| <b>Figure S2.</b> Plasmid vector for expression of EiCsm6.....                                                                                                        | S8  |
| <b>Figure S3.</b> SDS-PAGE analysis of purified Csm6 proteins.....                                                                                                    | S9  |
| <b>Figure S4.</b> Optimization of the lengths of two arms of DNAzyme strand.....                                                                                      | S10 |
| <b>Figure S5.</b> Optimization of the concentration of substrate and TtCsm6.....                                                                                      | S11 |
| <b>Figure S6.</b> Optimization of the amount of DNAzyme strand and buffer pH.....                                                                                     | S12 |
| <b>Figure S7.</b> Optimization of the reaction temperature and time of DNAzyme cutting.....                                                                           | S13 |
| <b>Figure S8.</b> Optimization of the reaction temperature and time of CRISPR reporting.....                                                                          | S14 |
| <b>Figure S9.</b> Optimization of the one-step cDNAzyme assay for Pb <sup>2+</sup> detection.....                                                                     | S15 |

**Table S1.** Oligonucleotide sequences

| Number | Oligonucleotide | Sequences ( 5' to 3' )                                                     |
|--------|-----------------|----------------------------------------------------------------------------|
| 1      | Sub (Sub-F2)    | <b>rArArArA</b> GGAAGTGGTAACGTCAATTG                                       |
| 2      | Sub-E           | <b>rArArArArArA</b> GGAAGTGGTAACGTCAATTG                                   |
| 3      | Sub-F0          | <b>rArArArA</b> GGAAGTGGTAACGTCAATTG                                       |
| 4      | Sub-F1          | <b>rArArArA</b> GGAAGTGGTAACGTCAATTG                                       |
| 5      | Sub-F3          | <b>rArArArA</b> GGAAGTGGTAACGTCAATTG                                       |
| 6      | Sub-H2          | <b>rArArArA</b> GGAAGTGGTAACGTCAATTG                                       |
| 7      | Sub-OMe2        | <b>rArArArA</b> GGAAGTGGTAACGTCAATTG                                       |
| 8      | Dz-C 9-4t       | GTTACCACT GAAGTAGCGCCGCCG TTTT                                             |
| 9      | Dz-C 9-6t       | GTTACCACT GAAGTAGCGCCGCCG TTTTTT                                           |
| 10     | Dz-C 9-8t       | GTTACCACT GAAGTAGCGCCGCCG TTTTTTTT                                         |
| 11     | Dz-C 9-10t      | GTTACCACT GAAGTAGCGCCGCCG TTTTTTTTTT                                       |
| 12     | Dz-C 9-12t      | GTTACCACT GAAGTAGCGCCGCCG TTTTTTTTTTTT                                     |
| 13     | Dz-C 9-14t      | GTTACCACT GAAGTAGCGCCGCCG TTTTTTTTTTTTTT                                   |
| 14     | Dz-C 8-10t      | TTACCACT GAAGTAGCGCCGCCG TTTTTTTTTT                                        |
| 15     | Dz-C 10-10t     | CGTTACCACT GAAGTAGCGCCGCCG TTTTTTTTTT                                      |
| 16     | Dz-C 11-10t     | ACGTTACCACT GAAGTAGCGCCGCCG TTTTTTTTTT                                     |
| 17     | Dz-C 12-10t     | GACGTTACCACT GAAGTAGCGCCGCCG TTTTTTTTTT                                    |
| 18     | Dz-C 13-10t     | TGACGTTACCACT GAAGTAGCGCCGCCG TTTTTTTTTT                                   |
| 19     | Sub-O           | ACTCAC /i <b>BHQ1dT</b> / AT <b>rA</b> GGAAG /i <b>6FAMdT</b> / GATGGACGTG |
| 20     | Dz-O            | GTCCATCACT GAAGTAGCGCCGCCG TATAG                                           |
| 21     | C5 reporter     | <b>6FAM-rCrCrCrCrC-BHQ1</b>                                                |

\* The bold, red-marked letters represent the ribonucleotide at this position, the blue marked letters represent the ribonucleotides with 2'-F modification, the deep red marked letters represent the ribonucleotides with 2'-H, the green marked letters represent the ribonucleotides with 2'-OMe, and all other sequences are deoxyribonucleotides.

**Table S2.** Sequences of plasmids containing DNA sequences encoding for *Thermus thermophilus* Csm6 (TtCsm6) and *Enterococcus italicus* (EiCsm6)

| Proteins | Sequences                                                                                                                                                                                                                                                                                                                                                                                                                                                                                                                                                                                                                                                                                                                                                                                                                                                                                                                                                                                                                                                                                                                                                                                                                                                                                                                                                                                                                                                                                                                                                                                                                                                                                                                                                                                                                                                                                                                                                                                                                                                                                                                                                                                                                                                                                                                                                                                                                                                                                                                                                                                                                                                                                                                                                                                                                                                                                                                                                                  |
|----------|----------------------------------------------------------------------------------------------------------------------------------------------------------------------------------------------------------------------------------------------------------------------------------------------------------------------------------------------------------------------------------------------------------------------------------------------------------------------------------------------------------------------------------------------------------------------------------------------------------------------------------------------------------------------------------------------------------------------------------------------------------------------------------------------------------------------------------------------------------------------------------------------------------------------------------------------------------------------------------------------------------------------------------------------------------------------------------------------------------------------------------------------------------------------------------------------------------------------------------------------------------------------------------------------------------------------------------------------------------------------------------------------------------------------------------------------------------------------------------------------------------------------------------------------------------------------------------------------------------------------------------------------------------------------------------------------------------------------------------------------------------------------------------------------------------------------------------------------------------------------------------------------------------------------------------------------------------------------------------------------------------------------------------------------------------------------------------------------------------------------------------------------------------------------------------------------------------------------------------------------------------------------------------------------------------------------------------------------------------------------------------------------------------------------------------------------------------------------------------------------------------------------------------------------------------------------------------------------------------------------------------------------------------------------------------------------------------------------------------------------------------------------------------------------------------------------------------------------------------------------------------------------------------------------------------------------------------------------------|
| TtCsm6   | <p>atggaagatctggatgcactgtgggaacgttaccgtgaagcgggttcgtgcaggcggtaacccgcaggcgt<br/> gtatcaggaaatggttgccggcgctgctggcgctgtggcgtaaaaaaccgcgtgtttaccgttccgcag<br/> gccttcgtgtctctgttcacaccctgggtaccagcccgaagcgaccgcgtggccatcctgggcgcgggc<br/> gctgaacgtgtttacgtgctgcacccccggaatccgcgcgttccgtccgcgctgcccaggacaccggt<br/> aaagacctgtacccggtggaaatcggtaaatctgatgtggaagcgattatcggaagttaaactgtgctgg<br/> aaaaacacccggaagtccggtggcactggatctgaccagcgggactaaagctatgtccgtggcctggcg<br/> gcagccggcttcttccagcgttttatccgaaagttcgtgtttacgtggataacgaggactacgatccgga<br/> actgcgccgtccgcgtgctggtaccgaaaaactgcgcacctgccgaacccgcacgaagcgctggcgga<br/> gtagatgcgtgttcgaaaaagaactctatggcaaaggtaattcggccaggccgcagcgtacttccgcggt<br/> atggttggccgcaccggaaccaggcgtagcactgtatgcgctgctggcagaaatgtaccgtgcatggcgt<br/> gcactggactttggtgaagccctgaaagcggggccgtaaatcttggccagctgagccagaacgtgtggtg<br/> aaccacccgctgaacgcccgcgtgaagcgctggaagcgcaggttgcctgctggaagcggtagatcgtt<br/> cctgaaagcccgcgacttcgctctgaaagaagggtgtttacggcctggcgcgtagcgtgctgcacctggcaca<br/> ggaagctaaagaagaagcggcggtgctggccgcactgtatgcataccgcgctctggaactgctgctgcagg<br/> aacgtctggcgctgctgggcccgtgctgtaagctccgggtctgagcccgaagaagccgaagccctgcgt<br/> aaagctctggcggaactgctgggcgtcctgccggaagaagtgcgcctgccggcgaaactgggtctgctgga<br/> cctgctggcattcctgcgctgaaaggcgacgaagctctgggcccgtgagcctggctgaactgcgcggtctt<br/> gcaggcgcgctgaaaggctgaactccgcgctgctggtgcacggctttgacgtgccgagcccgaagcagt<br/> agaaggcatcgacgcctggcgagggcctgctgcaggacctggaagcgcgacccgcgtgggtccgct<br/> gtctccggaaccggtgccgctgggttctaa</p> <p>atgaaaatcctgttcagccgatcggtaacaccgatccgtggcgcaacgatcgtgacggcgcgatgctgca<br/> catcgtgcgtcactaccagccggaccgtgtgttctgttttaccgaaagcatctggcagggttaaccagcactt<br/> ctccggccagcaggcggttcgattgggttaaaattatccagagcatcaacgaaaactgccagatcgaaatcaa<br/> atgcgacaccatcgaaagtgaaaacgacttcgatgcgtacaaagacctgttccaccagtagctgggtgaaga<br/> aaaacgtaaaatacccgaaacgcggaatctttctgaactgacctccggtacccgcagatggaaaccaccc<br/> tgtcctggaatacgttacctacccggacaaaatgcgctgcatccagggtgagcaccgcgtgaaaacctcta<br/> acgcgaaaactaaatatgcgcaggcggttgccaggaagttgatctggaaatcgtaacgaagaagaatct<br/> cagcagccgagccgttgccataaaatcgcatcctgtcttccgtgaagctatcgtgcgtaaccagatcaaat<br/> ccctgctggataactacgattacgaagcgccctgcagctggttgcgagccagaaatccttccgtaacggca<br/> aagaaatccgtaaaaaactgaaagaactgatcgtatgatataaaatgcaccgcgtgttcagctacctgatca<br/> aacagtatccgcgcaacgaaaaactgcagaaagcgctgctgcacaccatcctgctggaaatgcgccacca<br/> gcgcggtgacatcgcggaaccctgatccgtgtgaaaagcatcgcggaatacatcgttgaacagtacatcc<br/> agaaaaactatccgtacctgatcatctacaaagaagataaaaccgtacttcaacgtgagctacagccaggaa<br/> ctgaccgaatcttacctggcgctgatggactctcgtacaaagaaaaccaaaaaagatgaccgttgatagc<br/> ctggaccgtattctgggttcccggttaccgtgacttctgcagctgctggaagcgagcaacgaaatgacca<br/> acgaaatgaacaaagttaacgaaatcaacaacctgcgtacaaagtgcgcacaacctggactccctgaa<br/> cctggatcgtgataaaaacggctgtaaaatcaccaacgcggttaccgcggttctaccatgctgctggcggtt<br/> tcccggaagtgcaggaaaacgatttccactacctgaaacagtttaaccagttatcaaaagaactgctgtaa</p> |
| EiCsm6   | <p>ccctgctggataactacgattacgaagcgccctgcagctggttgcgagccagaaatccttccgtaacggca<br/> aagaaatccgtaaaaaactgaaagaactgatcgtatgatataaaatgcaccgcgtgttcagctacctgatca<br/> aacagtatccgcgcaacgaaaaactgcagaaagcgctgctgcacaccatcctgctggaaatgcgccacca<br/> gcgcggtgacatcgcggaaccctgatccgtgtgaaaagcatcgcggaatacatcgttgaacagtacatcc<br/> agaaaaactatccgtacctgatcatctacaaagaagataaaaccgtacttcaacgtgagctacagccaggaa<br/> ctgaccgaatcttacctggcgctgatggactctcgtacaaagaaaaccaaaaaagatgaccgttgatagc<br/> ctggaccgtattctgggttcccggttaccgtgacttctgcagctgctggaagcgagcaacgaaatgacca<br/> acgaaatgaacaaagttaacgaaatcaacaacctgcgtacaaagtgcgcacaacctggactccctgaa<br/> cctggatcgtgataaaaacggctgtaaaatcaccaacgcggttaccgcggttctaccatgctgctggcggtt<br/> tcccggaagtgcaggaaaacgatttccactacctgaaacagtttaaccagttatcaaaagaactgctgtaa</p>                                                                                                                                                                                                                                                                                                                                                                                                                                                                                                                                                                                                                                                                                                                                                                                                                                                                                                                                                                                                                                                                                                                                                                                                                                                                                                                                                                                                                                                                                                                                                                                                                                                                                                                                                                                                                                                                                                                                                                                                                                                                                                                                                                            |

**Table S3.** Detection of Pb<sup>2+</sup> spiked in the fresh egg and tap water samples

| Samples   | Added (nM) | Found (nM) | Recovery (%) | RSD (%) n=3 |
|-----------|------------|------------|--------------|-------------|
| Fresh egg | 10         | 9.01       | 90.09        | 3.12        |
|           | 30         | 27.13      | 90.43        | 1.51        |
|           | 50         | 52.66      | 105.32       | 1.71        |
| Tap water | 10         | 9.34       | 93.42        | 2.35        |
|           | 30         | 27.09      | 90.29        | 2.71        |
|           | 50         | 56.09      | 112.17       | 3.14        |

**Table S4.** Comparisons of detection performance of different fluorescent assays for Pb<sup>2+</sup> sensing

| Strategy                                    | Recognition                     | One-step   | One-tube   | Separation required | Elaborate probe design | Linear range      | LOD          | Application                 | Ref.                                         |
|---------------------------------------------|---------------------------------|------------|------------|---------------------|------------------------|-------------------|--------------|-----------------------------|----------------------------------------------|
| <b>Csm6-DNAzyme tandem assay</b>            | <b>DNAzyme</b>                  | <b>Yes</b> | <b>Yes</b> | <b>No</b>           | <b>No</b>              | <b>0.1-100 nM</b> | <b>70 pM</b> | <b>Water, eggs and mice</b> | <b>This work</b>                             |
| Magnetic separation-based Cas12a-DNAzyme    | DNAzyme                         | No         | No         | Yes                 | Yes                    | 0.01-10 nM        | 53 pM        | Water                       | <i>ACS Sens.</i> , 2020, 5, 970-977          |
| Cas12a/Cas14a-DNAzyme                       | DNAzyme                         | No         | No         | Yes                 | Yes                    | 0.24-48 nM        | 480 pM       | Water                       | <i>Anal. Chim. Acta</i> , 2022, 1192, 339356 |
| Cas12a-G-quadruplex assay                   | G-quadruplex                    | No         | Yes        | No                  | No                     | 0.1 nM- 5 µM      | 2.6 nM       | Tea Beverage and milk       | <i>Food Chem.</i> , 2022, 378, 131802        |
| Cell-free paper-based biosensor             | Allosteric transcription factor | No         | Yes        | No                  | No                     | 1-250 nM          | 0.1 nM       | Water                       | <i>J. Hazard. Mater.</i> , 2022, 438, 129499 |
| Tetrahedral DNA Nanostructure-based DNAzyme | DNAzyme                         | Yes        | Yes        | No                  | Yes                    | 0-500 nM          | 0.9125 nM    | Tobacco leaf extracts       | <i>J. Clean. Prod.</i> , 2022, 362, 132544   |
| Label-free sequential DNAzyme               | DNAzyme                         | No         | Yes        | No                  | Yes                    | 0.1-10            | 0.22         | Water and eggs              | <i>ACS Sens.</i> , 2018, 3, 2660-2666        |

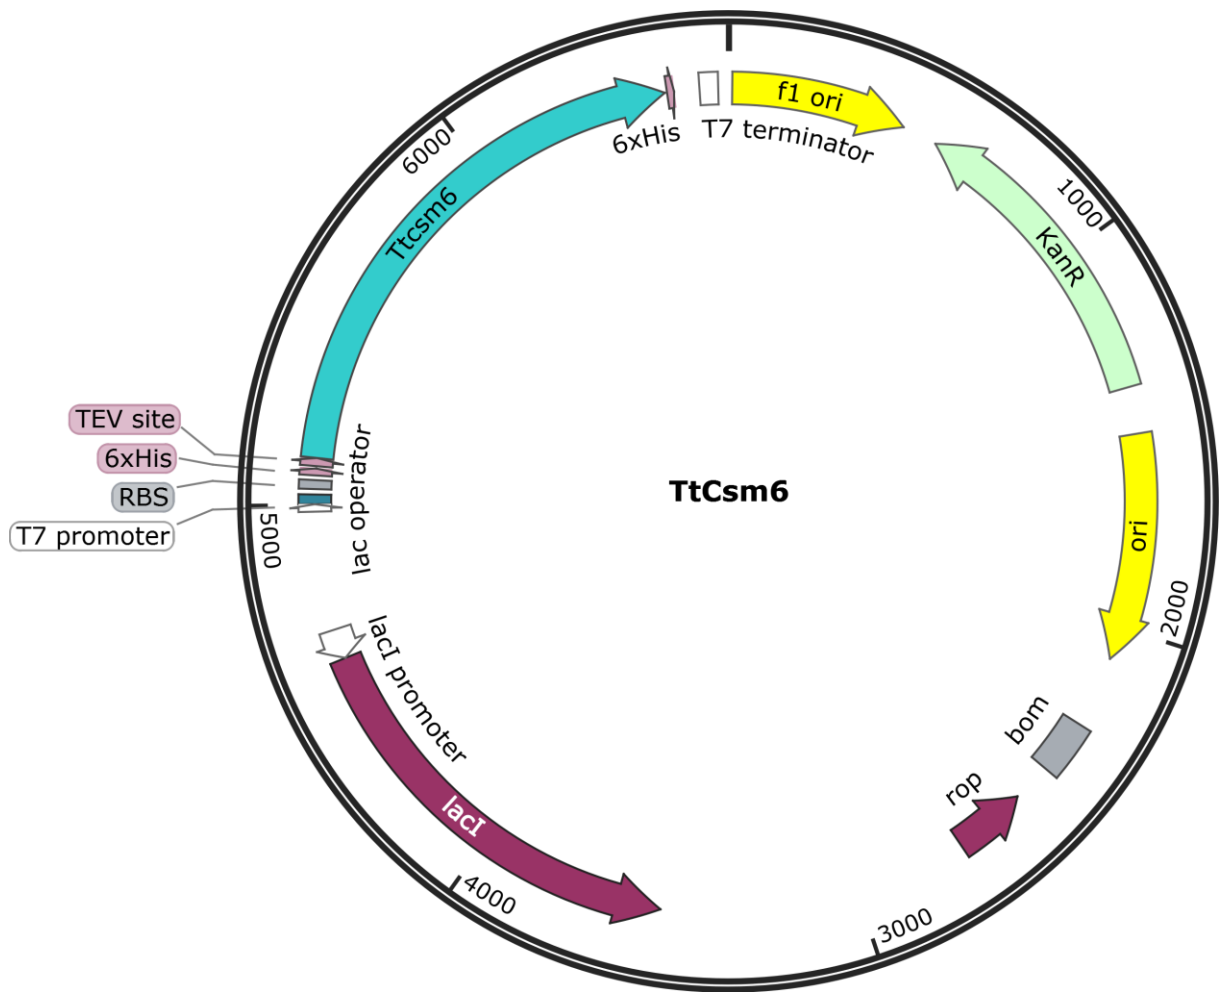

**Figure S1.** Plasmid vector for expression of TtCsm6.

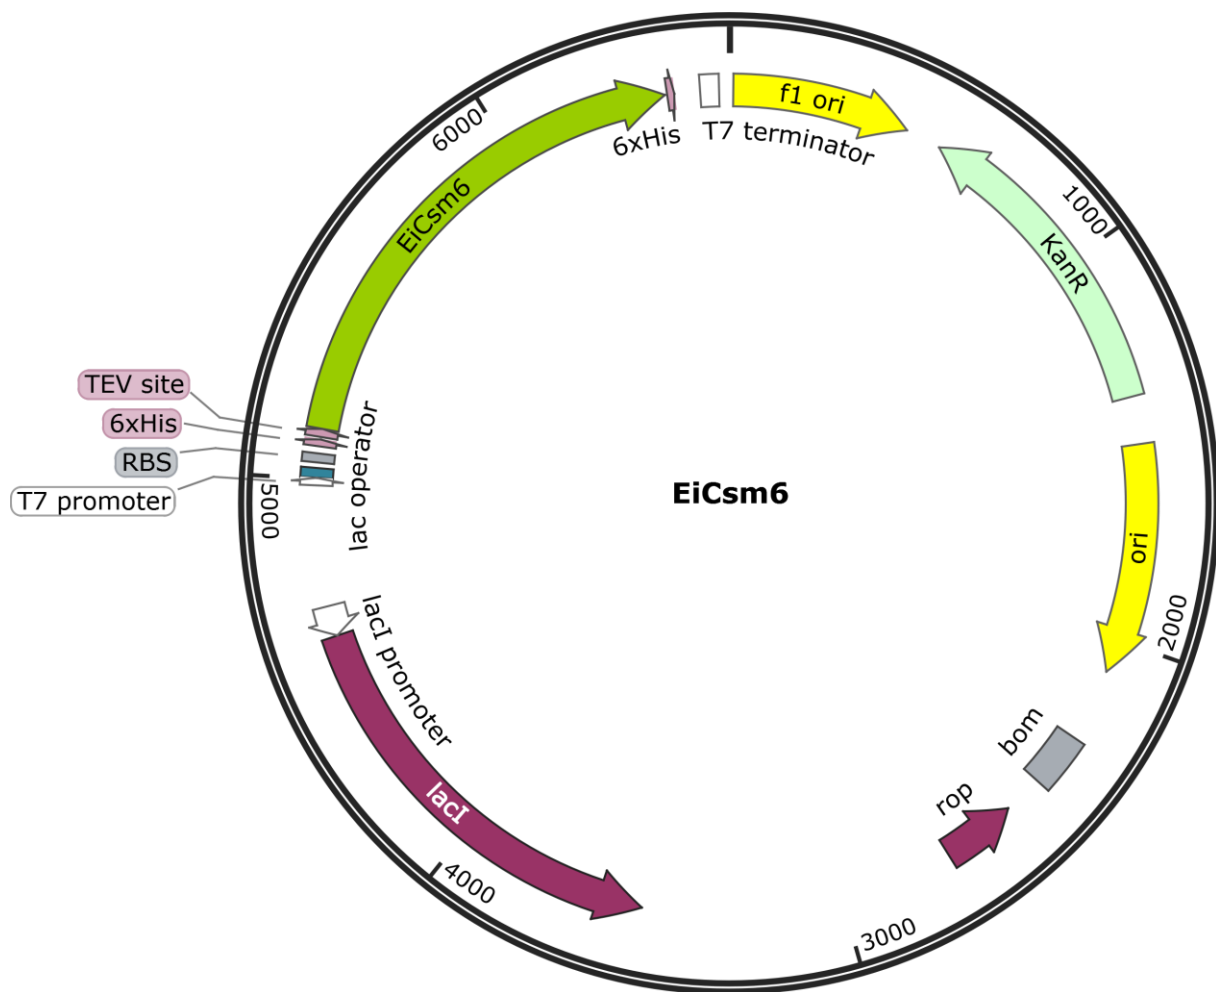

**Figure S2.** Plasmid vector for expression of EiCsm6.



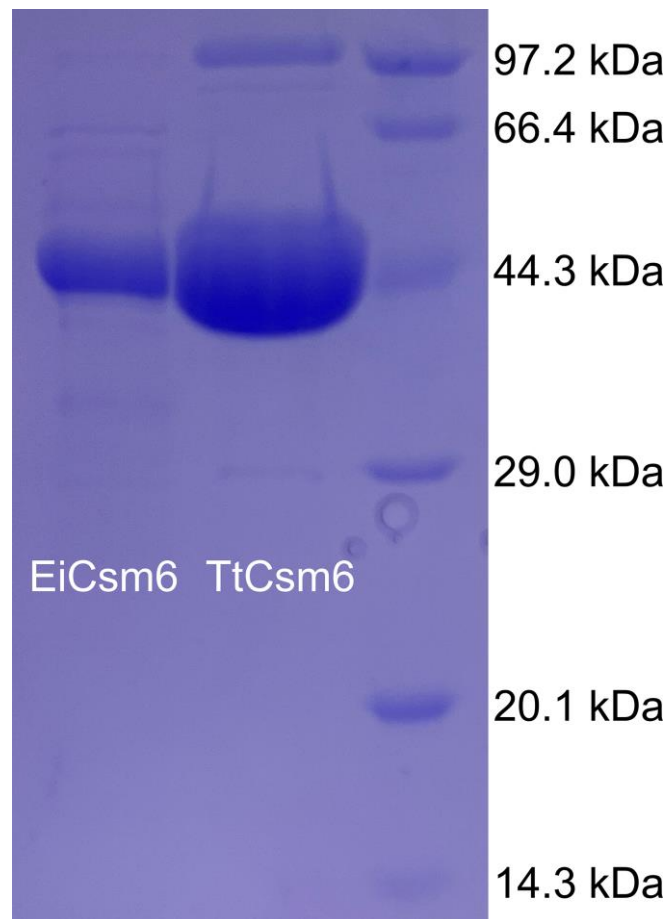

**Figure S3.** SDS-PAGE analysis of purified Csm6 proteins.

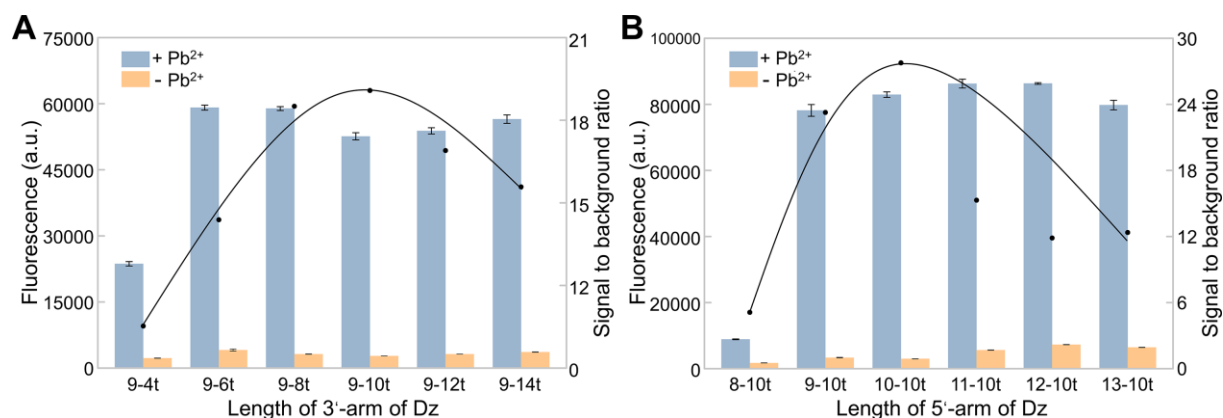

**Figure S4.** Optimization of the lengths of two arms of DNAzyme strand. Fluorescence signal and signal-to-background ratio of the cDNAzyme assay response to Pb<sup>2+</sup> using **Sub** probes that hybridized with **Dz** with different arm lengths (3'-part) (A), different arm lengths (5'-part) (B). The excitation wavelength was 480 nm, with the corresponding emission wavelength of 510-600 nm. The concentrations of Pb<sup>2+</sup>, **Sub** and **Dz** were 150 nM, 400 nM and 400, respectively.

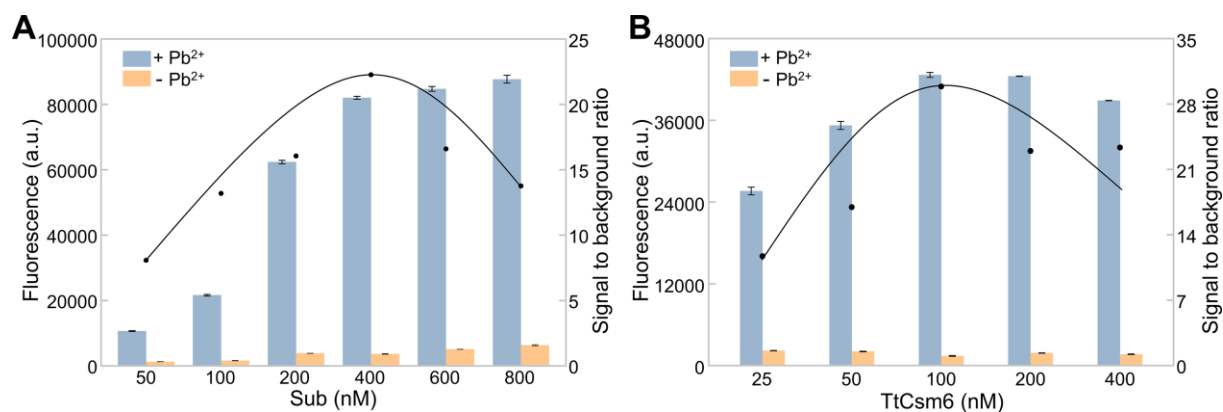

**Figure S5.** Optimization of the concentration of substrate and TtCsm6. Fluorescence signal and signal-to-background ratio of the cDNAzyme assay response to Pb<sup>2+</sup> using different concentrations of **Sub** (A), using different concentration of TtCsm6 (B). The excitation wavelength was 480 nm, with the corresponding emission wavelength of 510-600 nm. The concentrations of Pb<sup>2+</sup>, **Sub** and **Dz** were 150 nM, 400 nM and 400, respectively.

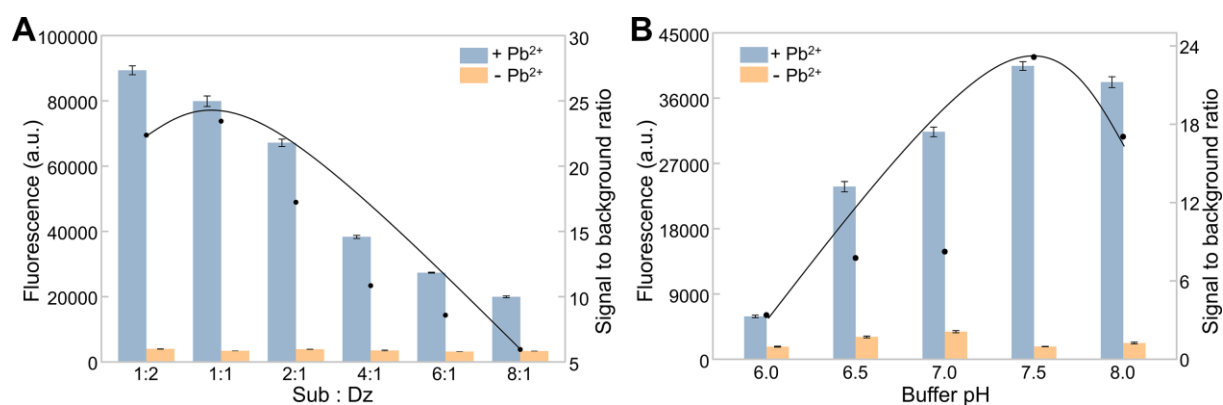

**Figure S6.** Optimization of the amount of DNAzyme strand and buffer pH. Fluorescence signal and signal-to-background ratio of the cDNAzyme assay response to Pb<sup>2+</sup> using different ratios of **Sub** to **Dz** (A), using different buffer pH (B). The excitation wavelength was 480 nm, with the corresponding emission wavelength of 510-600 nm. The concentrations of Pb<sup>2+</sup>, **Sub** and **Dz** were 150 nM, 400 nM and 400, respectively.

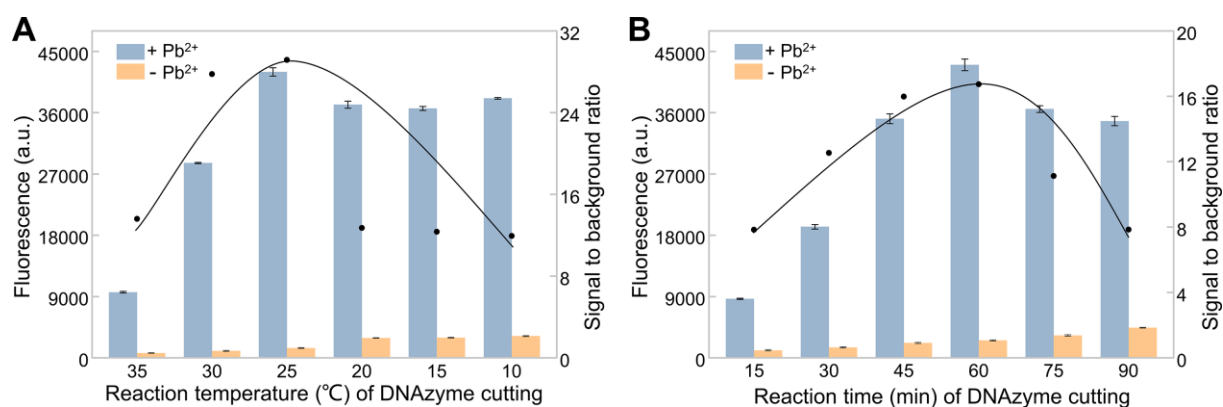

**Figure S7.** Optimization of the reaction temperature and time of DNAzyme cutting.

Fluorescence signal and signal-to-background ratio of the cDNAzyme assay response to Pb<sup>2+</sup> using different reaction temperature (A) and time (B) of DNAzyme cutting. The excitation wavelength was 480 nm, with the corresponding emission wavelength of 510-600 nm. The concentrations of Pb<sup>2+</sup>, **Sub** and **Dz** were 150 nM, 400 nM and 400, respectively.

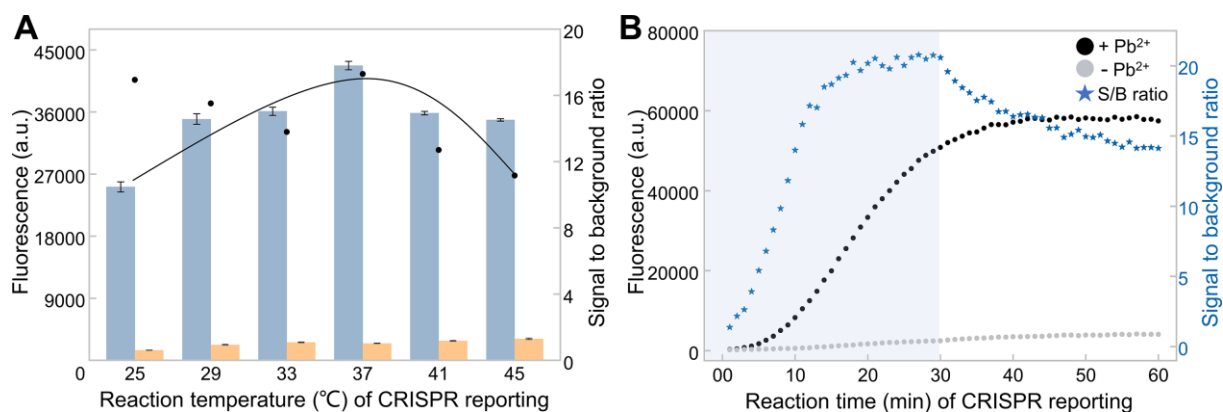

**Figure S8.** Optimization of the reaction temperature and time of CRISPR reporting.

Fluorescence signal and signal-to-background ratio of the cDNAzyme assay response to Pb<sup>2+</sup> using different reaction temperature (A) and time (B) of CRISPR reporting. The excitation wavelength was 480 nm, with the corresponding emission wavelength of 510-600 nm. The concentrations of Pb<sup>2+</sup>, **Sub** and **Dz** were 150 nM, 400 nM and 400, respectively.

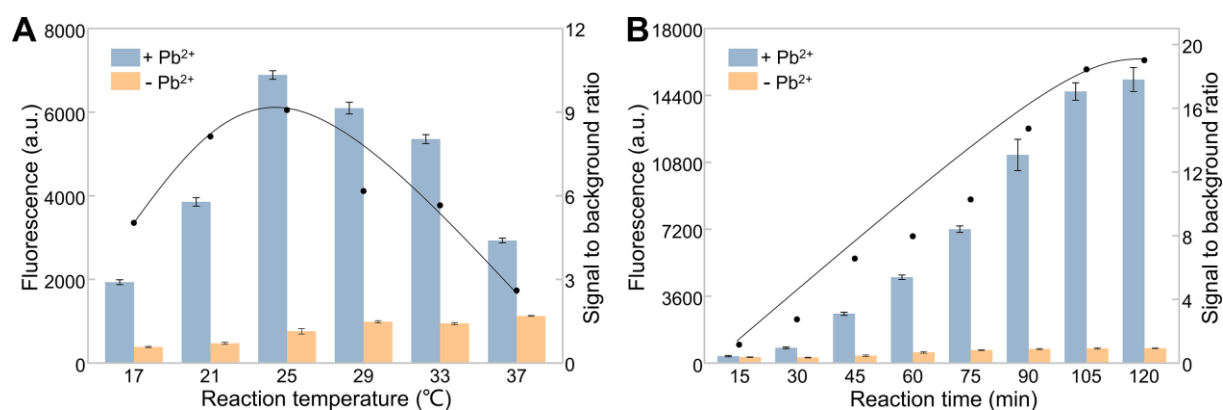

**Figure S9.** Optimization of the one-step cDNAzyme assay for Pb<sup>2+</sup> detection.

Fluorescence signal and signal-to-background ratio of the cDNAzyme assay response to Pb<sup>2+</sup> using different reaction temperature (A) and reaction time (B). The excitation wavelength was 480 nm, with the corresponding emission wavelength of 510-600 nm. The concentrations of Pb<sup>2+</sup>, **Sub** and **Dz** were 150 nM, 400 nM and 400, respectively. The reaction time was 1 h.
